# Supplementary material
Source: publisher figshare collection journal article supplement (https://acs.figshare.com/ndownloader/files/4048060)
Supplement: Supplementary file 1 [file 4048060]

 
data_2w
  
_audit_creation_method            SHELXL-97 
_chemical_name_systematic 
; 
 ? 
; 
_chemical_name_common             ? 
_chemical_melting_point           ? 
_chemical_formula_moiety          'C20 H15 N3 O'  
_chemical_formula_sum 
 'C20 H15 N3 O' 
_chemical_formula_weight          313.35 
  
loop_ 
 _atom_type_symbol 
 _atom_type_description 
 _atom_type_scat_dispersion_real 
 _atom_type_scat_dispersion_imag 
 _atom_type_scat_source 
 'C'  'C'   0.0033   0.0016 
 'International Tables Vol C Tables 4.2.6.8 and 6.1.1.4' 
 'H'  'H'   0.0000   0.0000 
 'International Tables Vol C Tables 4.2.6.8 and 6.1.1.4' 
 'N'  'N'   0.0061   0.0033 
 'International Tables Vol C Tables 4.2.6.8 and 6.1.1.4' 
 'O'  'O'   0.0106   0.0060 
 'International Tables Vol C Tables 4.2.6.8 and 6.1.1.4' 
  
_symmetry_cell_setting            Monoclinic 
_symmetry_space_group_name_H-M    P2(1)/c 
  
loop_ 
 _symmetry_equiv_pos_as_xyz 
 'x, y, z' 
 '-x, y+1/2, -z+1/2' 
 '-x, -y, -z' 
 'x, -y-1/2, z-1/2' 
  
_cell_length_a                    10.4219(5) 
_cell_length_b                    8.5137(4) 
_cell_length_c                    17.6503(9) 
_cell_angle_alpha                 90.00 
_cell_angle_beta                  101.891(2) 
_cell_angle_gamma                 90.00 
_cell_volume                      1532.49(13) 
_cell_formula_units_Z             4 
_cell_measurement_temperature     103(2) 
_cell_measurement_reflns_used     7436 
_cell_measurement_theta_min       2.36 
_cell_measurement_theta_max       30.02 
  
_exptl_crystal_description        block 
_exptl_crystal_colour             colourless 
_exptl_crystal_size_max           0.40 
_exptl_crystal_size_mid           0.40 
_exptl_crystal_size_min           0.38 
_exptl_crystal_density_meas       ? 
_exptl_crystal_density_diffrn     1.358 
_exptl_crystal_density_method     'not measured' 
_exptl_crystal_F_000              656 
_exptl_absorpt_coefficient_mu     0.086 
_exptl_absorpt_correction_type    multi-scan
_exptl_absorpt_correction_T_min   0.9663 
_exptl_absorpt_correction_T_max   0.9679 
_exptl_absorpt_process_details    sadabs 
  
_exptl_special_details 
; 
 ? 
; 
  
_diffrn_ambient_temperature       103(2) 
_diffrn_radiation_wavelength      0.71073 
_diffrn_radiation_type            MoK\a 
_diffrn_radiation_source          'fine-focus sealed tube' 
_diffrn_radiation_monochromator   graphite 
_diffrn_measurement_device_type   'Bruker APEX-II CCD' 
_diffrn_measurement_method        '\f and \w scans' 
_diffrn_detector_area_resol_mean  ? 
_diffrn_reflns_number             24793 
_diffrn_reflns_av_R_equivalents   0.0408 
_diffrn_reflns_av_sigmaI/netI     0.0303 
_diffrn_reflns_limit_h_min        -14 
_diffrn_reflns_limit_h_max        10 
_diffrn_reflns_limit_k_min        -11 
_diffrn_reflns_limit_k_max        11 
_diffrn_reflns_limit_l_min        -24 
_diffrn_reflns_limit_l_max        24 
_diffrn_reflns_theta_min          2.00 
_diffrn_reflns_theta_max          30.07 
_reflns_number_total              4486 
_reflns_number_gt                 3606 
_reflns_threshold_expression      >2sigma(I) 
  
_computing_data_collection        'Bruker APEX2' 
_computing_cell_refinement        'Bruker SAINT' 
_computing_data_reduction         'Bruker SAINT' 
_computing_structure_solution     'SHELXS-97 (Sheldrick, 2008)' 
_computing_structure_refinement   'SHELXL-97 (Sheldrick, 2008)' 
_computing_molecular_graphics     'Bruker SHELXTL' 
_computing_publication_material   'Bruker SHELXTL' 
  
_refine_special_details 
; 
 Refinement of F^2^ against ALL reflections.  The weighted R-factor wR and 
 goodness of fit S are based on F^2^, conventional R-factors R are based 
 on F, with F set to zero for negative F^2^. The threshold expression of 
 F^2^ > 2sigma(F^2^) is used only for calculating R-factors(gt) etc. and is 
 not relevant to the choice of reflections for refinement.  R-factors based 
 on F^2^ are statistically about twice as large as those based on F, and R- 
 factors based on ALL data will be even larger. 
; 
  
_refine_ls_structure_factor_coef  Fsqd 
_refine_ls_matrix_type            full 
_refine_ls_weighting_scheme       calc 
_refine_ls_weighting_details 
 'calc w=1/[\s^2^(Fo^2^)+(0.0853P)^2^+0.2822P] where P=(Fo^2^+2Fc^2^)/3' 
_atom_sites_solution_primary      direct 
_atom_sites_solution_secondary    difmap 
_atom_sites_solution_hydrogens    geom 
_refine_ls_hydrogen_treatment     constr
_refine_ls_extinction_method      none 
_refine_ls_extinction_coef        ? 
_refine_ls_number_reflns          4486 
_refine_ls_number_parameters      217 
_refine_ls_number_restraints      0 
_refine_ls_R_factor_all           0.0606 
_refine_ls_R_factor_gt            0.0457 
_refine_ls_wR_factor_ref          0.1418 
_refine_ls_wR_factor_gt           0.1249 
_refine_ls_goodness_of_fit_ref    1.059 
_refine_ls_restrained_S_all       1.059 
_refine_ls_shift/su_max           0.000 
_refine_ls_shift/su_mean          0.000 
  
loop_ 
 _atom_site_label 
 _atom_site_type_symbol 
 _atom_site_fract_x 
 _atom_site_fract_y 
 _atom_site_fract_z 
 _atom_site_U_iso_or_equiv 
 _atom_site_adp_type 
 _atom_site_occupancy 
 _atom_site_symmetry_multiplicity 
 _atom_site_calc_flag 
 _atom_site_refinement_flags 
 _atom_site_disorder_assembly 
 _atom_site_disorder_group 
C1 C 0.43879(11) 0.52610(12) 0.18865(6) 0.0155(2) Uani 1 1 d . . . 
C2 C 0.39226(12) 0.42104(13) 0.06681(6) 0.0175(2) Uani 1 1 d . . . 
C3 C 0.43053(13) 0.32674(14) 0.00942(7) 0.0217(2) Uani 1 1 d . . . 
H3 H 0.5154 0.2808 0.0206 0.026 Uiso 1 1 calc R . . 
C4 C 0.23405(14) 0.36414(15) -0.07389(7) 0.0258(3) Uani 1 1 d . . . 
H4 H 0.1785 0.3436 -0.1227 0.031 Uiso 1 1 calc R . . 
C5 C 0.18635(13) 0.45883(15) -0.02258(7) 0.0225(3) Uani 1 1 d . . . 
H5 H 0.1008 0.5027 -0.0358 0.027 Uiso 1 1 calc R . . 
C6 C 0.26798(12) 0.48820(13) 0.04957(6) 0.0178(2) Uani 1 1 d . . . 
C7 C 0.22557(11) 0.58872(13) 0.10723(6) 0.0177(2) Uani 1 1 d . . . 
C8 C 0.28286(11) 0.70718(12) 0.23570(6) 0.0157(2) Uani 1 1 d . . . 
H8A H 0.2328 0.7971 0.2090 0.019 Uiso 1 1 calc R . . 
H8B H 0.3647 0.7491 0.2680 0.019 Uiso 1 1 calc R . . 
C9 C 0.20280(11) 0.63053(12) 0.28799(6) 0.0159(2) Uani 1 1 d . . . 
C10 C 0.12534(12) 0.49789(13) 0.26660(7) 0.0193(2) Uani 1 1 d . . . 
H10 H 0.1204 0.4525 0.2169 0.023 Uiso 1 1 calc R . . 
C11 C 0.05511(12) 0.43162(14) 0.31772(7) 0.0224(3) Uani 1 1 d . . . 
H11 H 0.0030 0.3408 0.3029 0.027 Uiso 1 1 calc R . . 
C12 C 0.06085(12) 0.49744(15) 0.39007(7) 0.0238(3) Uani 1 1 d . . . 
H12 H 0.0140 0.4509 0.4251 0.029 Uiso 1 1 calc R . . 
C13 C 0.13526(13) 0.63164(15) 0.41119(7) 0.0249(3) Uani 1 1 d . . . 
H13 H 0.1378 0.6785 0.4603 0.030 Uiso 1 1 calc R . . 
C14 C 0.20621(12) 0.69757(14) 0.36032(7) 0.0205(2) Uani 1 1 d . . . 
H14 H 0.2574 0.7891 0.3751 0.025 Uiso 1 1 calc R . . 
C15 C 0.53192(11) 0.54647(12) 0.26405(6) 0.0159(2) Uani 1 1 d . . . 
C16 C 0.50713(12) 0.48245(13) 0.33255(7) 0.0184(2) Uani 1 1 d . . . 
H16 H 0.4256 0.4328 0.3330 0.022 Uiso 1 1 calc R . . 
C17 C 0.60325(13) 0.49219(14) 0.40018(7) 0.0216(2) Uani 1 1 d . . . 
H17 H 0.5877 0.4474 0.4468 0.026 Uiso 1 1 calc R . . 
C18 C 0.72139(13) 0.56684(14) 0.39992(7) 0.0222(2) Uani 1 1 d . . . 
H18 H 0.7861 0.5737 0.4464 0.027 Uiso 1 1 calc R . . 
C19 C 0.74542(12) 0.63167(13) 0.33192(7) 0.0209(2) Uani 1 1 d . . . 
H19 H 0.8261 0.6836 0.3320 0.025 Uiso 1 1 calc R . . 
C20 C 0.65126(12) 0.62039(13) 0.26391(7) 0.0180(2) Uani 1 1 d . . . 
H20 H 0.6682 0.6631 0.2172 0.022 Uiso 1 1 calc R . . 
N1 N 0.31730(9) 0.60060(10) 0.17698(5) 0.0154(2) Uani 1 1 d . . . 
N2 N 0.47825(10) 0.44045(11) 0.13715(6) 0.0175(2) Uani 1 1 d . . . 
N3 N 0.35455(12) 0.29886(12) -0.05910(6) 0.0252(2) Uani 1 1 d . . . 
O1 O 0.12071(9) 0.65785(11) 0.09696(5) 0.0244(2) Uani 1 1 d . . . 
  
loop_ 
 _atom_site_aniso_label 
 _atom_site_aniso_U_11 
 _atom_site_aniso_U_22 
 _atom_site_aniso_U_33 
 _atom_site_aniso_U_23 
 _atom_site_aniso_U_13 
 _atom_site_aniso_U_12 
C1 0.0169(5) 0.0122(4) 0.0183(5) 0.0020(4) 0.0054(4) -0.0003(4) 
C2 0.0229(6) 0.0129(4) 0.0180(5) -0.0001(4) 0.0071(4) -0.0033(4) 
C3 0.0275(6) 0.0167(5) 0.0235(6) -0.0024(4) 0.0110(5) -0.0024(4) 
C4 0.0343(7) 0.0250(6) 0.0183(5) -0.0042(4) 0.0061(5) -0.0087(5) 
C5 0.0246(6) 0.0226(6) 0.0199(5) -0.0003(4) 0.0034(4) -0.0046(5) 
C6 0.0217(6) 0.0149(5) 0.0177(5) 0.0002(4) 0.0061(4) -0.0029(4) 
C7 0.0188(6) 0.0158(5) 0.0186(5) 0.0006(4) 0.0039(4) -0.0006(4) 
C8 0.0170(5) 0.0113(4) 0.0195(5) -0.0019(4) 0.0049(4) 0.0005(4) 
C9 0.0148(5) 0.0136(5) 0.0193(5) 0.0001(4) 0.0035(4) 0.0026(4) 
C10 0.0195(6) 0.0163(5) 0.0224(5) -0.0018(4) 0.0048(4) -0.0007(4) 
C11 0.0180(6) 0.0187(5) 0.0305(6) 0.0029(4) 0.0048(5) -0.0026(4) 
C12 0.0201(6) 0.0261(6) 0.0267(6) 0.0072(5) 0.0082(5) 0.0022(5) 
C13 0.0282(7) 0.0269(6) 0.0211(6) -0.0002(5) 0.0082(5) 0.0017(5) 
C14 0.0225(6) 0.0182(5) 0.0207(5) -0.0026(4) 0.0043(4) -0.0016(4) 
C15 0.0173(5) 0.0121(5) 0.0183(5) -0.0006(4) 0.0039(4) 0.0026(4) 
C16 0.0204(6) 0.0154(5) 0.0203(5) 0.0012(4) 0.0065(4) 0.0013(4) 
C17 0.0284(7) 0.0183(5) 0.0184(5) 0.0022(4) 0.0058(4) 0.0040(4) 
C18 0.0238(6) 0.0187(5) 0.0216(5) -0.0012(4) -0.0008(4) 0.0044(4) 
C19 0.0187(6) 0.0158(5) 0.0272(6) -0.0004(4) 0.0025(4) 0.0005(4) 
C20 0.0197(6) 0.0136(5) 0.0214(5) 0.0021(4) 0.0056(4) 0.0026(4) 
N1 0.0165(5) 0.0131(4) 0.0171(4) -0.0011(3) 0.0045(3) 0.0003(3) 
N2 0.0199(5) 0.0144(4) 0.0190(4) 0.0001(3) 0.0061(4) 0.0006(3) 
N3 0.0350(6) 0.0208(5) 0.0221(5) -0.0043(4) 0.0112(4) -0.0068(4) 
O1 0.0205(5) 0.0272(5) 0.0242(4) -0.0021(3) 0.0012(3) 0.0057(3) 
  
_geom_special_details 
; 
 All esds (except the esd in the dihedral angle between two l.s. planes) 
 are estimated using the full covariance matrix.  The cell esds are taken 
 into account individually in the estimation of esds in distances, angles 
 and torsion angles; correlations between esds in cell parameters are only 
 used when they are defined by crystal symmetry.  An approximate (isotropic) 
 treatment of cell esds is used for estimating esds involving l.s. planes. 
; 
  
loop_ 
 _geom_bond_atom_site_label_1 
 _geom_bond_atom_site_label_2 
 _geom_bond_distance 
 _geom_bond_site_symmetry_2 
 _geom_bond_publ_flag 
C1 N2 1.2966(14) . ? 
C1 N1 1.3929(14) . ? 
C1 C15 1.4869(15) . ? 
C2 N2 1.3832(15) . ? 
C2 C6 1.3909(17) . ? 
C2 C3 1.4128(16) . ? 
C3 N3 1.3235(16) . ? 
C3 H3 0.9500 . ? 
C4 N3 1.3488(19) . ? 
C4 C5 1.3794(17) . ? 
C4 H4 0.9500 . ? 
C5 C6 1.4006(16) . ? 
C5 H5 0.9500 . ? 
C6 C7 1.4659(15) . ? 
C7 O1 1.2214(14) . ? 
C7 N1 1.3982(14) . ? 
C8 N1 1.4763(13) . ? 
C8 C9 1.5138(15) . ? 
C8 H8A 0.9900 . ? 
C8 H8B 0.9900 . ? 
C9 C14 1.3922(15) . ? 
C9 C10 1.3942(15) . ? 
C10 C11 1.3930(16) . ? 
C10 H10 0.9500 . ? 
C11 C12 1.3844(18) . ? 
C11 H11 0.9500 . ? 
C12 C13 1.3880(18) . ? 
C12 H12 0.9500 . ? 
C13 C14 1.3935(17) . ? 
C13 H13 0.9500 . ? 
C14 H14 0.9500 . ? 
C15 C20 1.3944(16) . ? 
C15 C16 1.3980(15) . ? 
C16 C17 1.3937(16) . ? 
C16 H16 0.9500 . ? 
C17 C18 1.3864(18) . ? 
C17 H17 0.9500 . ? 
C18 C19 1.3898(17) . ? 
C18 H18 0.9500 . ? 
C19 C20 1.3885(16) . ? 
C19 H19 0.9500 . ? 
C20 H20 0.9500 . ? 
  
loop_ 
 _geom_angle_atom_site_label_1 
 _geom_angle_atom_site_label_2 
 _geom_angle_atom_site_label_3 
 _geom_angle 
 _geom_angle_site_symmetry_1 
 _geom_angle_site_symmetry_3 
 _geom_angle_publ_flag 
N2 C1 N1 124.23(10) . . ? 
N2 C1 C15 116.75(10) . . ? 
N1 C1 C15 119.01(9) . . ? 
N2 C2 C6 123.31(10) . . ? 
N2 C2 C3 119.01(11) . . ? 
C6 C2 C3 117.68(11) . . ? 
N3 C3 C2 123.57(12) . . ? 
N3 C3 H3 118.2 . . ? 
C2 C3 H3 118.2 . . ? 
N3 C4 C5 124.12(12) . . ? 
N3 C4 H4 117.9 . . ? 
C5 C4 H4 117.9 . . ? 
C4 C5 C6 117.89(12) . . ? 
C4 C5 H5 121.1 . . ? 
C6 C5 H5 121.1 . . ? 
C2 C6 C5 119.29(11) . . ? 
C2 C6 C7 119.24(10) . . ? 
C5 C6 C7 121.46(11) . . ? 
O1 C7 N1 121.62(10) . . ? 
O1 C7 C6 124.53(11) . . ? 
N1 C7 C6 113.84(10) . . ? 
N1 C8 C9 114.04(9) . . ? 
N1 C8 H8A 108.7 . . ? 
C9 C8 H8A 108.7 . . ? 
N1 C8 H8B 108.7 . . ? 
C9 C8 H8B 108.7 . . ? 
H8A C8 H8B 107.6 . . ? 
C14 C9 C10 118.97(10) . . ? 
C14 C9 C8 117.99(10) . . ? 
C10 C9 C8 123.04(10) . . ? 
C11 C10 C9 120.32(11) . . ? 
C11 C10 H10 119.8 . . ? 
C9 C10 H10 119.8 . . ? 
C12 C11 C10 120.32(11) . . ? 
C12 C11 H11 119.8 . . ? 
C10 C11 H11 119.8 . . ? 
C11 C12 C13 119.77(11) . . ? 
C11 C12 H12 120.1 . . ? 
C13 C12 H12 120.1 . . ? 
C12 C13 C14 119.98(11) . . ? 
C12 C13 H13 120.0 . . ? 
C14 C13 H13 120.0 . . ? 
C9 C14 C13 120.60(11) . . ? 
C9 C14 H14 119.7 . . ? 
C13 C14 H14 119.7 . . ? 
C20 C15 C16 120.09(10) . . ? 
C20 C15 C1 117.97(10) . . ? 
C16 C15 C1 121.72(10) . . ? 
C17 C16 C15 119.29(11) . . ? 
C17 C16 H16 120.4 . . ? 
C15 C16 H16 120.4 . . ? 
C18 C17 C16 120.43(11) . . ? 
C18 C17 H17 119.8 . . ? 
C16 C17 H17 119.8 . . ? 
C17 C18 C19 120.20(11) . . ? 
C17 C18 H18 119.9 . . ? 
C19 C18 H18 119.9 . . ? 
C20 C19 C18 119.88(11) . . ? 
C20 C19 H19 120.1 . . ? 
C18 C19 H19 120.1 . . ? 
C19 C20 C15 120.10(10) . . ? 
C19 C20 H20 120.0 . . ? 
C15 C20 H20 120.0 . . ? 
C1 N1 C7 122.21(9) . . ? 
C1 N1 C8 121.41(9) . . ? 
C7 N1 C8 116.20(9) . . ? 
C1 N2 C2 117.12(10) . . ? 
C3 N3 C4 117.44(11) . . ? 
  
_diffrn_measured_fraction_theta_max    0.997 
_diffrn_reflns_theta_full              30.07 
_diffrn_measured_fraction_theta_full   0.997 
_refine_diff_density_max    0.445 
_refine_diff_density_min   -0.296 
_refine_diff_density_rms    0.088 

_publ_contact_author
;
Dr Shunsuke Chiba
Division of Chemistry and Biological Chemistry
School of Physical and Mathematical Sciences
Nanyang Technological University
21 Nanyang Link
Singapore 637371
Singapore
;
_publ_contact_author_phone       '+65 6513 8013'
_publ_contact_author_fax         '+65 6791 1961'
_publ_contact_author_email	'shunsuke@ntu.edu.sg'
_publ_requested_journal		'Organic Letters'
_publ_section_title		
;
'Oxidative Radical Skeletal Rearrangement Induced by Molecular Oxygen: Synthesis of Quinazolinones'
;

loop_
	_publ_author_name
	_publ_author_address
'Yi-Feng Wang'
;Division of Chemistry and Biological Chemistry
School of Physical and Mathematical Sciences
Nanyang Technological University
21 Nanyang Link
Singapore 637371
Singapore
;
'Feng-Lian Zhang'
;Division of Chemistry and Biological Chemistry
School of Physical and Mathematical Sciences
Nanyang Technological University
21 Nanyang Link
Singapore 637371
Singapore
;
'Shunsuke Chiba'
;Division of Chemistry and Biological Chemistry
School of Physical and Mathematical Sciences
Nanyang Technological University
21 Nanyang Link
Singapore 637371
Singapore
;
